# Supplementary material for: A self-assembling peptidic platform to boost the cellular uptake and nuclear delivery of oligonucleotides
Source: Royal Society of Chemistry journal article supplement (doi:10.1039/d2bm00826b), 2022-01-01
Supplement: d2bm00826b1.pdf [file d2bm00826b1.pdf]

## Supporting Information

# A self-assembling peptidic platform for the delivery of oligonucleotides to the cell nucleus

Shabnam Tarvirdipour<sup>a,b,c</sup>, Michal Skowicki<sup>a</sup>, Cora-Ann Schoenenberger<sup>a</sup>, Larisa E. Kapinos<sup>d</sup>, Roderick Y. H. Lim<sup>d</sup>, Yaakov Benenson<sup>c\*</sup>, Cornelia G. Palivan<sup>a,b\*</sup>

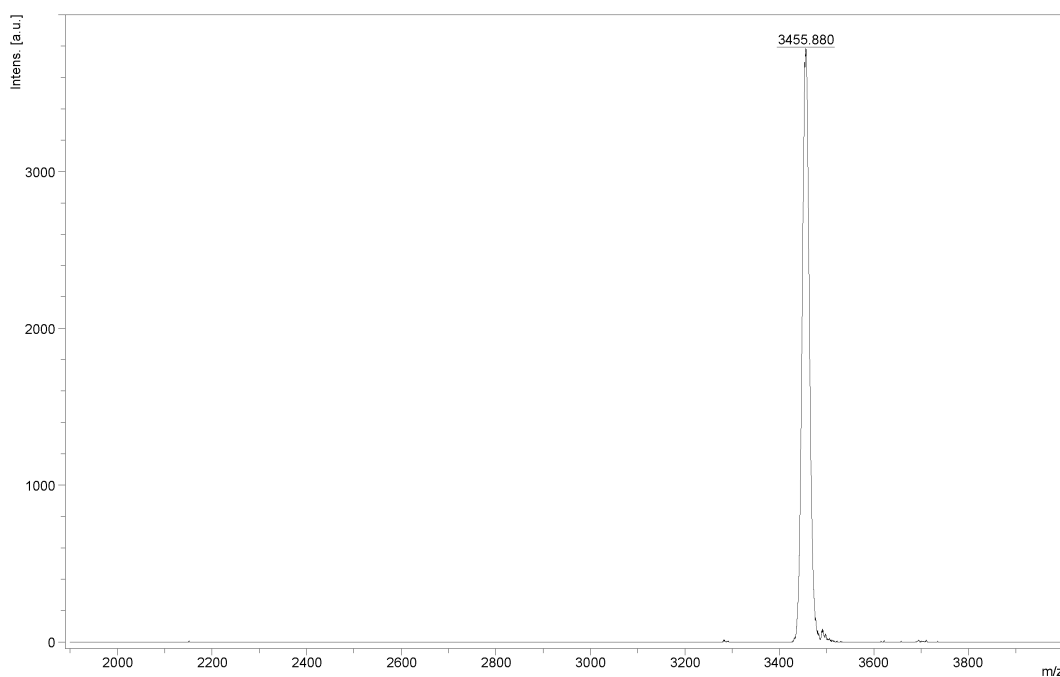

**Figure S1.** MALDI-TOF mass spectrum of NLS-peptide.

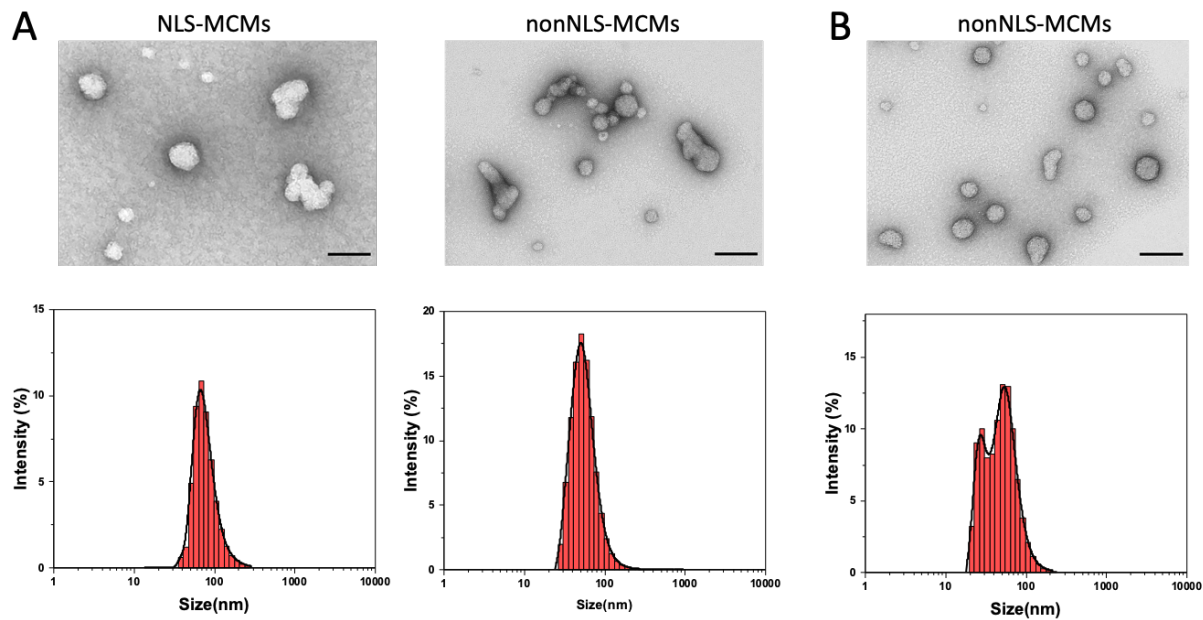

**Figure S2.** Ultrastructural morphology and size distribution of self-assembled NLS- and nonNLS-MCMs with different DNA payloads, A) scrambled, and B) G3139-GAP ASO. Scale bar, 100nm.

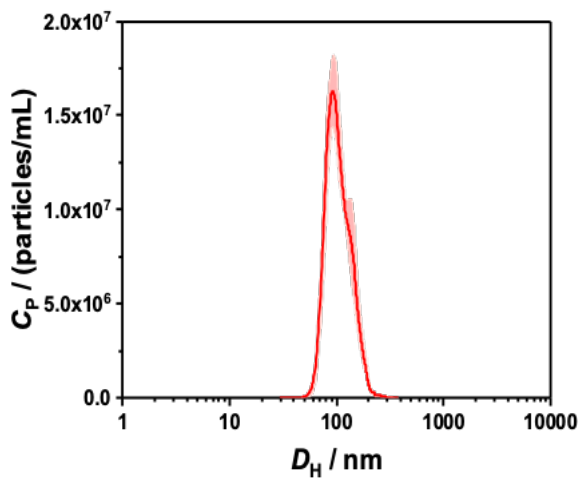

**Figure S3.** Hydrodynamic diameter of 22nt ssDNA-loaded NLS-MCMs determined by NTA.

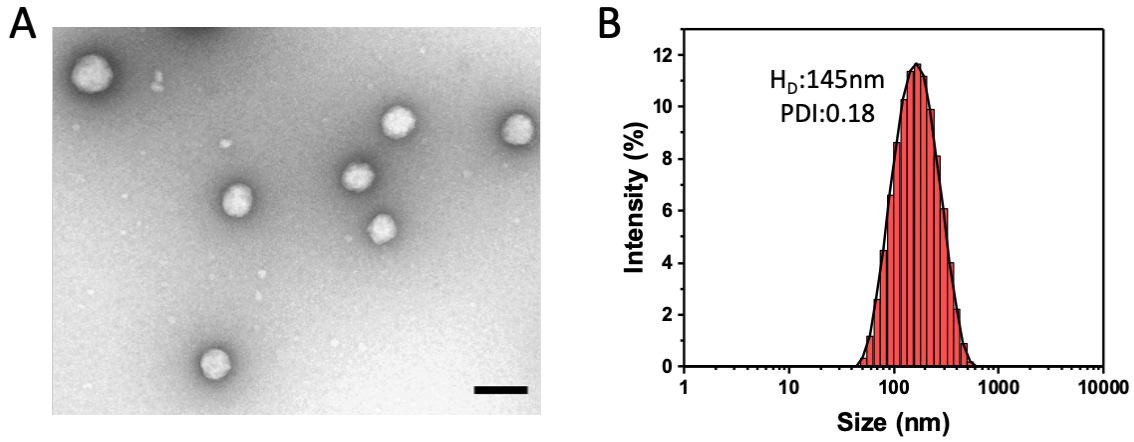

**Figure S4.** Characterization of self-assembled DNA-free NLS-MCMs. A) TEM, and B) DLS. Scale bar, 200nm.

**Table S1.** Characterization of NLS- and nonNLS-MCMs loaded with different oligonucleotides, suspended in water, at pH 7.

| MCM-NPs                            | PDI  | $D_n(\text{nm})$ | Zeta potential(mV) |
|------------------------------------|------|------------------|--------------------|
| Scrambled oligo loaded NLS-MCMs    | 0.19 | $76 \pm 2$       | $21 \pm 7$         |
| G3139-GAP loaded nonNLS-MCMs       | 0.28 | $52 \pm 14$      | $10 \pm 4$         |
| Scrambled oligo loaded nonNLS-MCMs | 0.18 | $58 \pm 8$       | $8 \pm 3$          |

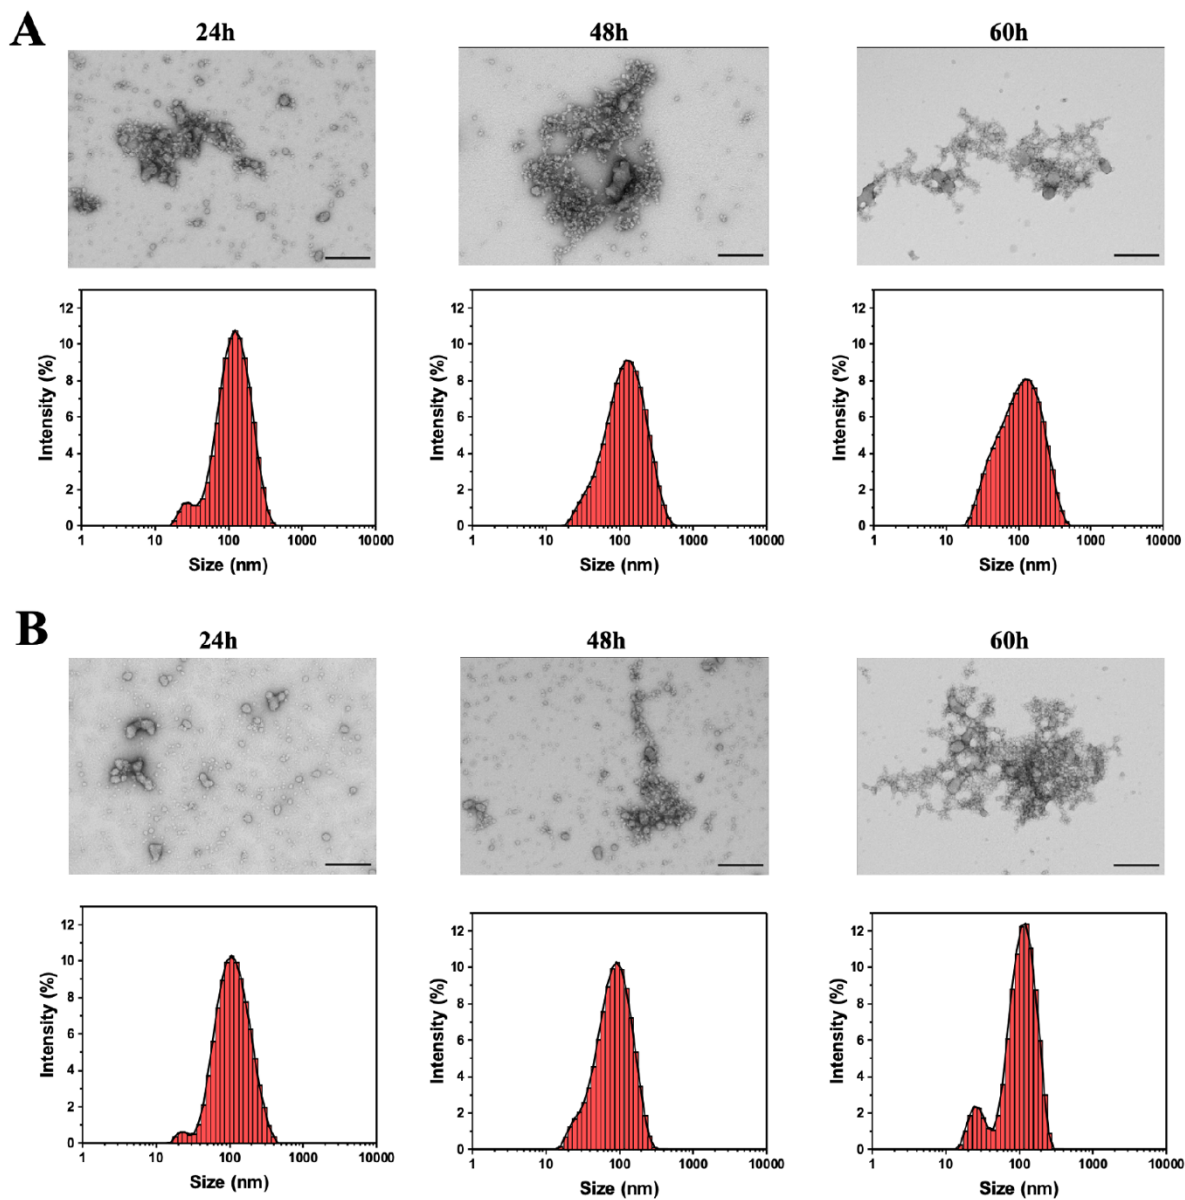

**Figure S5.** Thermo-responsiveness of NLS-MCMs. TEM and DLS analysis of NLS-MCMs A) with DNA, and B) without DNA after 24, 48 and 70 h incubation at 37 °C. Scale bars = 200 nm.

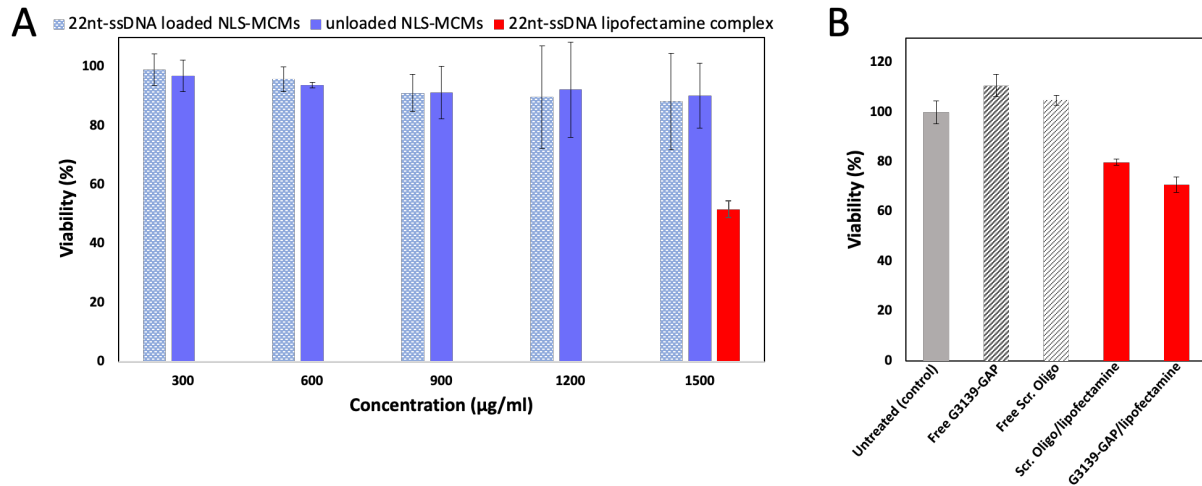

**Figure S6.** A) Effect of DNA-free and 22nt ssDNA-loaded NLS-MCMs on MCF-7 cell proliferation at different peptide concentrations after 24 h of exposure. Comparison at 1500µg/ml peptide concentration to lipofectamine complex with corresponding 22nt ssDNA concentration. B) lipofectamine-mediated transfection of scrambled oligonucleotides and G339-GAP ASO after 48 h of exposure.

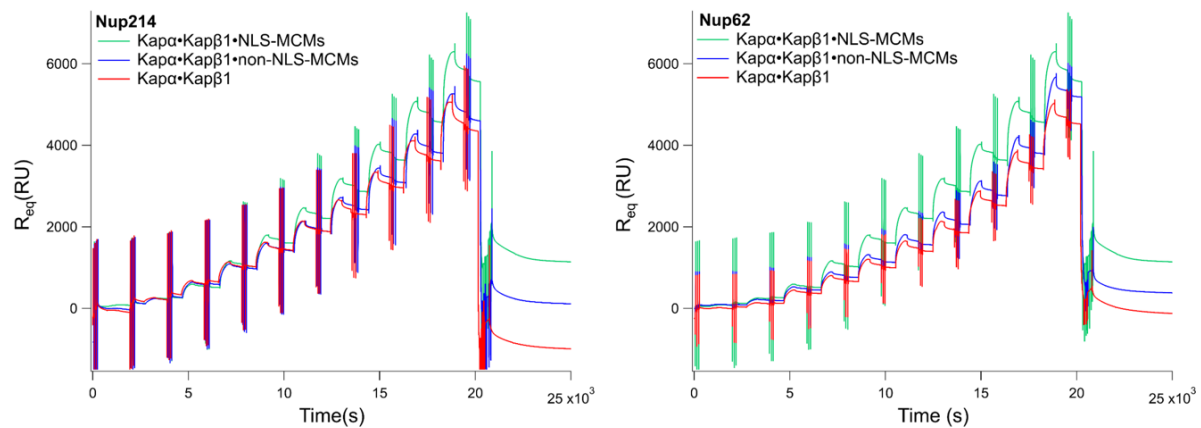

**Figure S7.** SPR sensograms resolve the binding interactions of Kap $\alpha$ •Kap $\beta$ 1•NLS-MCMs, Kap $\alpha$ •Kap $\beta$ 1•nonNLS-MCMs, and standalone Kap $\alpha$ •Kap $\beta$ 1 to Nup214 (left) and Nup62 (right).

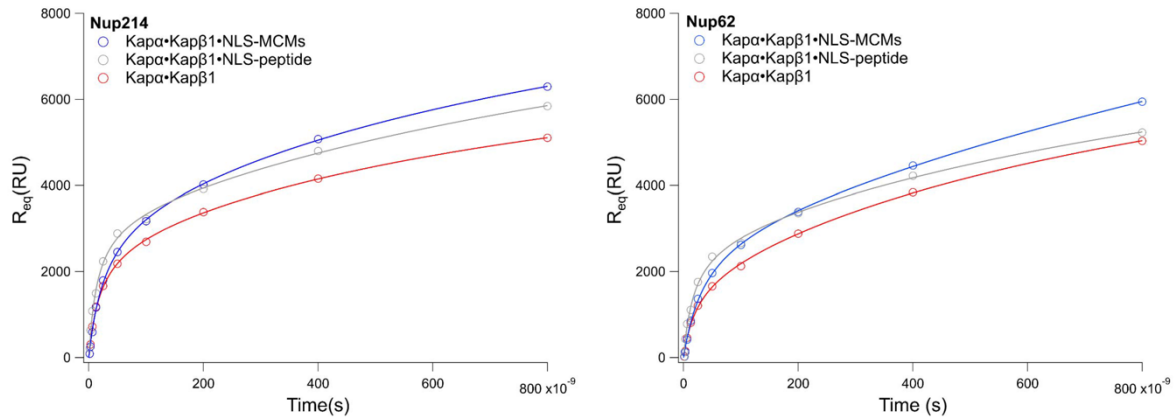

**Figure S8.** Langmuir isotherm fits (solid lines) for Kap $\alpha$ •Kap $\beta$ 1•NLS-MCMs compared to free NLS-peptide. MCM nanocarriers elicit the highest FG Nup-binding response compared to free peptide as measured by SPR.

**Table S2** Maximal SPR response signals and equilibrium dissociation constants of free peptide/karyopherin complexes binding to Nups.

|                                                     |        | $R_{max1}$ (RU) | $R_{max2}$ (RU) | $K_{D1}$ (nM) | $K_{D2}$ (nM) |
|-----------------------------------------------------|--------|-----------------|-----------------|---------------|---------------|
| Kap $\alpha$ •Kap $\beta$ 1 / NLS (free peptide)    | Nup214 | 3282.8±286      | 7809.3±3870     | 14.6±2.5      | 1574.6±1340   |
|                                                     | Nup62  | 2706±283        | 7122±2700       | 17.7±3.4      | 1396.3±990    |
| Kap $\alpha$ •Kap $\beta$ 1 / nonNLS (free peptide) | Nup214 | 2814.9±384      | 5748.8±1690     | 14.1±3.6      | 878.8±637     |
|                                                     | Nup62  | 1804.6±226      | 4764.2±485      | 14.5±3.2      | 637.2±216     |
| Kap $\alpha$ •Kap $\beta$ 1                         | Nup214 | 2672±387        | 5711.4±1850     | 19.4±4.8      | 1028.1±779    |
|                                                     | Nup62  | 1895±229        | 7495.2±1420     | 22.4±5.7      | 1077.3±477    |

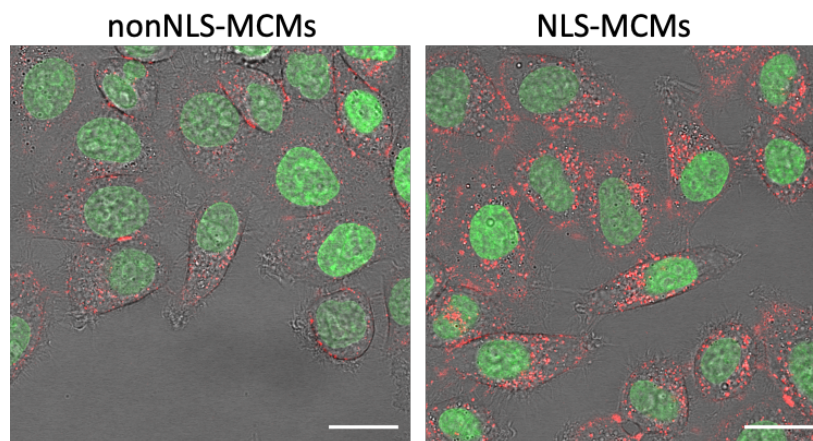

**Figure S9** CLSM merged images of H2B-GFP expressing HeLa cells recorded after 5 h incubation with DNA-loaded NLS- and nonNLS-MCMs. Scale bars, 20 $\mu$ m.

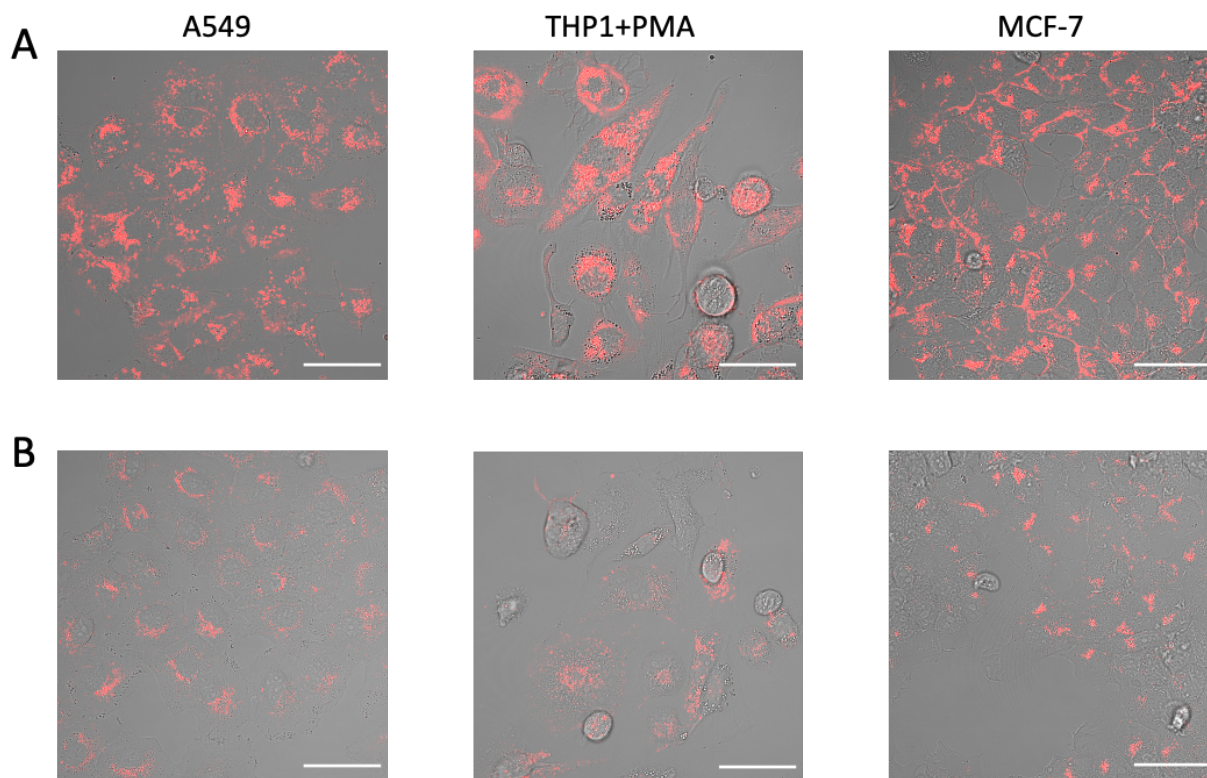

**Figure S10.** CLSM merged images of A549, THP1-stimulated with PMA and MCF-7 cells recorded after 24 h incubation with G3139-GAP-loaded A) NLS-MCMs, and B) nonNLS-MCMs. Scale bars = 50 $\mu$ m.

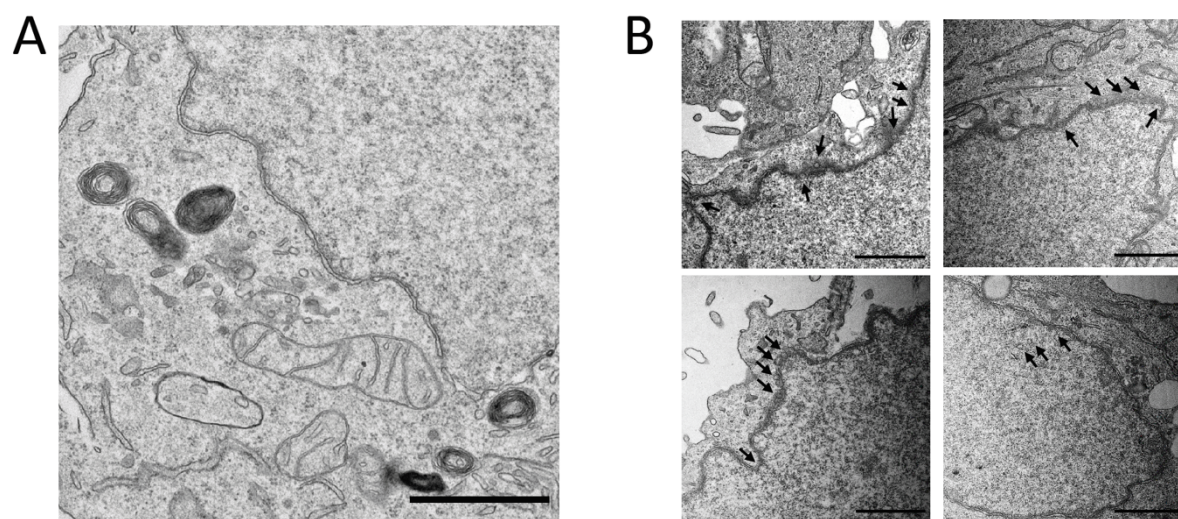

**Figure S11.** Ultrastructural analysis of A) untreated cells (control), B) cells treated with DNA-loaded NLS-MCMs, Scale bars, 1 $\mu$ m.

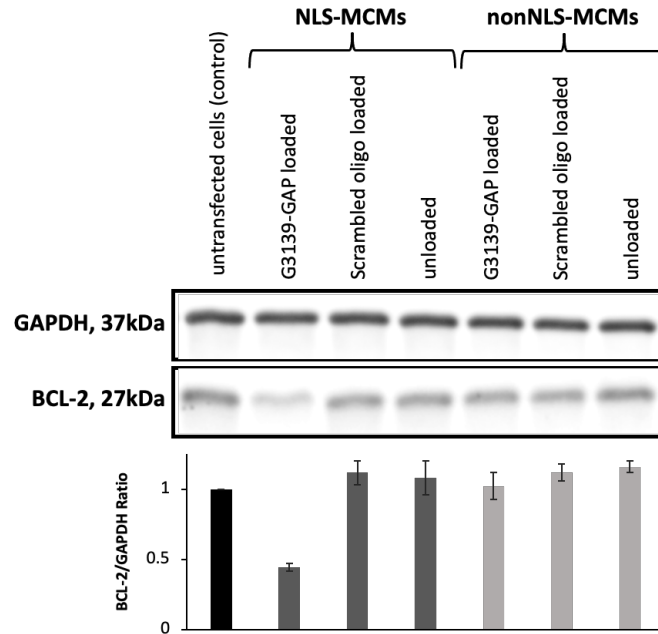

**Figure S12.** Western blot analysis of BCL-2 proteins in 6 $\mu$ g of MCF-7 total cell extract after 24 h. GAPDH was used as loading control. Quantitative densitometry of the immunoblots are mean  $\pm$  s.d. of the relative intensity of the bands from three independent assays; nonNLS-MCM-treated (dark grey bars), NLS-MCM-treated (dark grey bars), untreated (black bar).

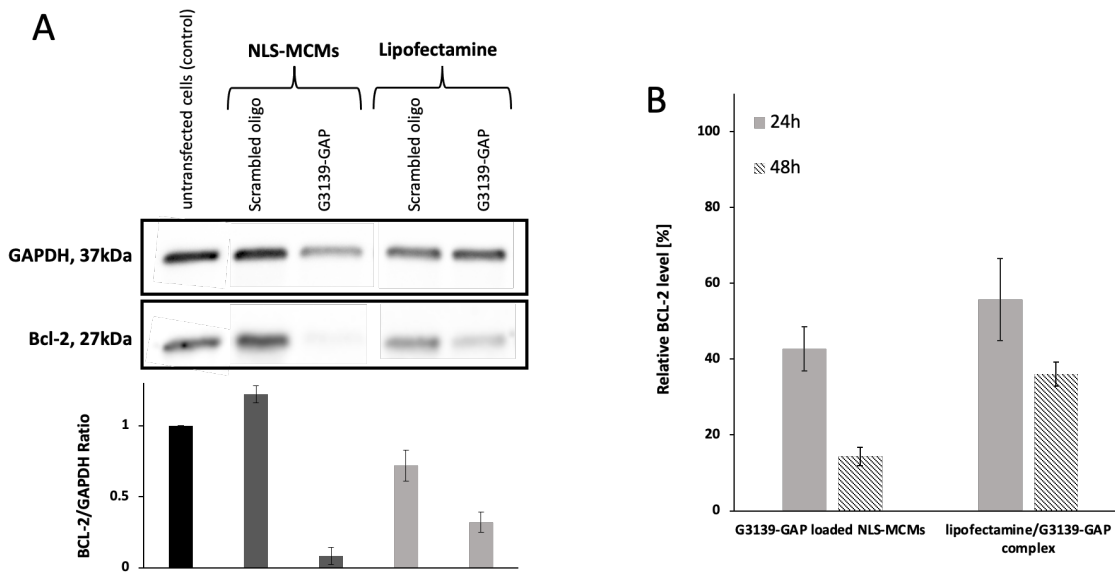

**Figure S13.** Therapeutic effects of cells transfected with lipofectamine/G3139-GAP complex. A) Western blot analysis of BCL-2 proteins in 6 $\mu$ g of MCF-7 total cell extract after 48 h. GAPDH was used as loading control. B)



Quantitative densitometry of the immunoblots. Lipofectamine-treated (light grey bars), NLS-MCM-treated (dark grey bars), untreated (black bar). C) BCL-2 expression levels in cells transfected with G3139-GAP relative to scrambled oligo delivered with NLS-MCMs or lipofectamine complexes. Data are mean $\pm$ s.d. of the relative intensity of the bands from three independent assays.
